# Supplementary material
Source: ML conference proceedings conference paper supplement (https://proceedings.mlr.press/v54/zhang17a.html)
Supplement: Supplementary file 1 [file zhang17a-supp.pdf]

# Supplementary Materials

## A Technical lemmas for Theorem 1

In this appendix, we prove technical lemmas that appear in the proof of Theorem 1.

### A.1 Proof of Lemma 1

The following inequality always holds:

$$\sup_{f \in \mathcal{F}} |G(f) - \ell(f)| \leq \max \left\{ \sup_{f \in \mathcal{F}} \{G(f) - \ell(f)\}, \sup_{f' \in \mathcal{F}} \{\ell(f') - G(f')\} \right\}.$$

Since  $\mathcal{F}$  contains the constant zero function, both  $\sup_{f \in \mathcal{F}} \{G(f) - \ell(f)\}$  and  $\sup_{f' \in \mathcal{F}} \{\ell(f') - G(f')\}$  are non-negative, which implies

$$\sup_{f \in \mathcal{F}} |G(f) - \ell(f)| \leq \sup_{f \in \mathcal{F}} \{G(f) - \ell(f)\} + \sup_{f' \in \mathcal{F}} \{\ell(f') - G(f')\}.$$

To establish Lemma 1, it suffices to prove:

$$\mathbb{E} \left[ \sup_{f \in \mathcal{F}} \{G(f) - \ell(f)\} \right] \leq 2LR_k(\mathcal{F}) \quad \text{and} \quad \mathbb{E} \left[ \sup_{f' \in \mathcal{F}} \{\ell(f') - G(f')\} \right] \leq 2LR_k(\mathcal{F})$$

For the rest of the proof, we will establish the first upper bound. The second bound can be established through an identical series of steps.

The inequality  $\mathbb{E}[\sup_{f \in \mathcal{F}} \{G(f) - \ell(f)\}] \leq 2LR_k(\mathcal{F})$  follows as a consequence of classical symmetrization techniques [e.g. [Bartlett and Mendelson, 2003](#)] and the Talagrand-Ledoux concentration [e.g. [Ledoux and Talagrand, 2013](#), Corollary 3.17]. However, so as to keep the paper self-contained, we provide a detailed proof here. By the definitions of  $\ell(f)$  and  $G(f)$ , we have

$$\mathbb{E} \left[ \sup_{f \in \mathcal{F}} \{G(f) - \ell(f)\} \right] = \mathbb{E} \left[ \sup_{f \in \mathcal{F}} \left\{ \frac{1}{k} \sum_{j=1}^k h(-y'_j f(x'_j)) - \mathbb{E} \left[ \frac{1}{k} \sum_{j=1}^k h(-y''_j f(x''_j)) \right] \right\} \right],$$

where  $(x''_j, y''_j)$  is an i.i.d. copy of  $(x'_j, y'_j)$ . Applying Jensen's inequality yields

$$\begin{aligned} \mathbb{E} \left[ \sup_{f \in \mathcal{F}} \{G(f) - \ell(f)\} \right] &\leq \mathbb{E} \left[ \sup_{f \in \mathcal{F}} \left\{ \frac{1}{k} \sum_{j=1}^k h(-y'_j f(x'_j)) - h(-y''_j f(x''_j)) \right\} \right] \\ &= \mathbb{E} \left[ \sup_{f \in \mathcal{F}} \left\{ \frac{1}{k} \sum_{j=1}^k \varepsilon_j (h(-y'_j f(x'_j)) - h(-y''_j f(x''_j))) \right\} \right] \\ &\leq \mathbb{E} \left[ \sup_{f \in \mathcal{F}} \left\{ \frac{1}{k} \sum_{j=1}^k \varepsilon_j h(-y'_j f(x'_j)) + \sup_{f \in \mathcal{F}} \frac{1}{k} \sum_{j=1}^k \varepsilon_j h(-y''_j f(x''_j)) \right\} \right] \\ &= 2\mathbb{E} \left[ \sup_{f \in \mathcal{F}} \left\{ \frac{1}{k} \sum_{j=1}^k \varepsilon_j h(-y'_j f(x'_j)) \right\} \right]. \end{aligned} \tag{13}$$

We need to bound the right-hand side using the Rademacher complexity of the function class  $\mathcal{F}$ , and we use an argument following the lecture notes of [Kakade and Tewari \[2008\]](#). Introducing the shorthand notation  $\varphi_j(x) := h(-y'_j x)$ , the  $L$ -Lipschitz continuity of  $\varphi_j$  implies that

$$\begin{aligned} \mathbb{E} \left[ \sup_{f \in \mathcal{F}} \sum_{j=1}^k \varepsilon_j \varphi_j(f(x'_j)) \right] &= \mathbb{E} \left[ \sup_{f, f' \in \mathcal{F}} \left\{ \frac{\varphi_1(f(x'_1)) - \varphi_1(f'(x'_1))}{2} + \sum_{j=2}^k \varepsilon_j \frac{\varphi_j(f(x'_j)) + \varphi_j(f'(x'_j))}{2} \right\} \right] \\ &\leq \mathbb{E} \left[ \sup_{f, f' \in \mathcal{F}} \left\{ \frac{L|f(x'_1) - f'(x'_1)|}{2} + \sum_{j=2}^k \varepsilon_j \frac{\varphi_j(f(x'_j)) + \varphi_j(f'(x'_j))}{2} \right\} \right] \\ &= \mathbb{E} \left[ \sup_{f, f' \in \mathcal{F}} \left\{ \frac{Lf(x'_1) - Lf'(x'_1)}{2} + \sum_{j=2}^k \varepsilon_j \frac{\varphi_j(f(x'_j)) + \varphi_j(f'(x'_j))}{2} \right\} \right]. \end{aligned}$$

Applying Jensen's inequality implies that the right-hand side is bounded by

$$\begin{aligned} \text{RHS} &\leq \frac{1}{2} \mathbb{E} \left[ \sup_{f \in \mathcal{F}} \left\{ Lf(x'_1) + \sum_{j=2}^k \varepsilon_j \varphi_j(f(x'_j)) \right\} + \sup_{f' \in \mathcal{F}} \left\{ -Lf(x'_1) + \sum_{j=2}^k \varepsilon_j \varphi_j(f'(x'_j)) \right\} \right] \\ &= \mathbb{E} \left[ \sup_{f \in \mathcal{F}} \left\{ \varepsilon_1 Lf(x'_1) + \sum_{j=2}^k \varepsilon_j \varphi_j(f(x'_j)) \right\} \right]. \end{aligned}$$

By repeating this argument for  $j = 2, 3, \dots, k$ , we obtain

$$\mathbb{E} \left[ \sup_{f \in \mathcal{F}} \sum_{j=1}^k \varepsilon_j \varphi_j(f(x'_j)) \right] \leq L \mathbb{E} \left[ \sup_{f \in \mathcal{F}} \sum_{j=1}^k \varepsilon_j f(x'_j) \right]. \quad (14)$$

Combining inequalities (13) and (14), we have the desired bound.

## A.2 Proof of Lemma 2

We prove the claim by induction on the number of layers  $m$ . It is known [\[Kakade et al., 2009\]](#) that  $R_k(\mathcal{N}_1) \leq \sqrt{\frac{q}{k}} B$ . Thus, the claim holds for the base case  $m = 1$ . Now consider some  $m > 1$ , and assume that the claim holds for  $m - 1$ . We then have

$$R_k(\mathcal{N}_1) = \mathbb{E} \left[ \sup_{f \in \mathcal{N}_m} \frac{1}{k} \sum_{i=1}^k \varepsilon_i f(x'_i) \right],$$

where  $\varepsilon_1, \dots, \varepsilon_n$  are Rademacher variables. By the definition of  $\mathcal{N}_m$ , we may write the expression as

$$\begin{aligned} R_k(\mathcal{N}_1) &= \mathbb{E} \left[ \sup_{f_1, \dots, f_d \in \mathcal{N}_{m-1}} \frac{1}{k} \sum_{i=1}^n \varepsilon_i \sum_{j=1}^d w_j \sigma(f_j(x'_i)) \right] = \mathbb{E} \left[ \sup_{f_1, \dots, f_d \in \mathcal{N}_{m-1}} \frac{1}{k} \sum_{j=1}^d w_j \sum_{i=1}^k \varepsilon_i \sigma(f_j(x'_i)) \right] \\ &\leq B \mathbb{E} \left[ \sup_{f \in \mathcal{N}_{m-1}} \frac{1}{k} \sum_{i=1}^k \varepsilon_i \sigma(f(x'_i)) \right] \\ &= BR_k(\sigma \circ \mathcal{N}_{m-1}), \end{aligned}$$

where the inequality follows since  $\|w\|_1 \leq B$ . Since the function  $\sigma$  is 1-Lipschitz continuous, following the proof of inequality (14), we have

$$R_k(\sigma \circ \mathcal{N}_{m-1}) \leq R_k(\mathcal{N}_{m-1}) \leq \sqrt{\frac{q}{n}} B^m,$$

which completes the proof.

### A.3 Proof of Lemma 3

We prove the claim by induction on the number of layers  $m$ . If  $m = 1$ , then  $f^*$  is a linear function and  $\varphi(f^*) \in [-B_1, B_1]^n$ . Since  $\varphi(g)$  minimizes the  $\ell_2$ -distance to vector  $u$ , we have

$$\|\varphi(g) - \varphi(f^*)\|_2 \leq \|\varphi(g) - u\|_2 + \|\varphi(f^*) - u\|_2 \leq 2\|\varphi(f^*) - u\|_2. \quad (15)$$

Since  $u$  is drawn uniformly from  $[-B, B]^k$ , with probability at least  $(\frac{\epsilon}{4})^k$  we have  $\|\varphi(f^*) - u\|_\infty \leq \frac{\epsilon B}{2}$ , and consequently

$$\|\varphi(g) - \varphi(f^*)\|_2 \leq \sqrt{k}\|\varphi(g) - \varphi(f^*)\|_\infty \leq \epsilon\sqrt{k}B,$$

which establishes the claim.

For  $m > 1$ , assume that the claim holds for  $m - 1$ . Our proof uses the following lemma:

**Lemma 4 (Maurey-Barron-Jones lemma)** *Consider any subset  $G$  of any Hilbert space  $H$  such that  $\|g\|_H \leq b$  for all  $g \in G$ . Then for any point  $v$  in the convex hull of  $G$ , there is a point  $v_s$  in the convex hull of  $s$  points of  $G$  such that  $\|v - v_s\|_H^2 \leq b^2/s$ .*

See the paper by Pisier [1980] for a proof.

Recall that  $f^*/B$  is in the convex hull of  $\sigma \circ \mathcal{N}_{m-1}$  and every function  $f \in \sigma \circ \mathcal{N}_{m-1}$  satisfies  $\|\varphi(f)\|_2 \leq \sqrt{k}$ . By Lemma 4, there exist  $s$  functions in  $\mathcal{N}_{m-1}$ , say  $\tilde{f}_1, \dots, \tilde{f}_s$ , and a vector  $w \in \mathbb{R}^s$  satisfying  $\|w\|_1 \leq B$  such that

$$\left\| \sum_{j=1}^s w_j \sigma(\varphi(\tilde{f}_j)) - \varphi(f^*) \right\|_2 \leq B\sqrt{\frac{k}{s}}.$$

Let  $\varphi(\tilde{f}) := \sum_{j=1}^s w_j \sigma(\varphi(\tilde{f}_j))$ . If we chose  $s = \lceil \frac{1}{\epsilon^2} \rceil$ , then we have

$$\|\varphi(\tilde{f}) - \varphi(f^*)\|_2 \leq \epsilon\sqrt{k}B. \quad (16)$$

Recall that the function  $g$  satisfies  $g = \sum_{j=1}^s v_j \sigma \circ g_j$  for  $g_1, \dots, g_s \in \mathcal{N}_{m-1}$ . Using the inductive hypothesis, we know that the following bound holds with probability at least  $p_{m-1}^s$ :

$$\|\sigma(\varphi(g_j)) - \sigma(\varphi(\tilde{f}_j))\|_2 \leq \|\varphi(g_j) - \varphi(\tilde{f}_j)\|_2 \leq (2m-3)\epsilon\sqrt{k}B^{m-1} \quad \text{for any } j \in [s].$$

As a consequence, we have

$$\begin{aligned} \left\| \sum_{j=1}^s w_j \sigma(\varphi(g_j)) - \sum_{j=1}^s w_j \sigma(\varphi(\tilde{f}_j)) \right\|_2 &\leq \sum_{j=1}^s |w_j| \cdot \|\sigma(\varphi(g_j)) - \sigma(\varphi(\tilde{f}_j))\|_2 \\ &\leq \|w\|_1 \cdot \max_{j \in [s]} \{\|\sigma(\varphi(g_j)) - \sigma(\varphi(\tilde{f}_j))\|_2\} \leq (2m-3)\sqrt{k}\epsilon B^m. \end{aligned} \quad (17)$$

Finally, we bound the distance between  $\sum_{j=1}^s w_j \sigma(\varphi(g_j))$  and  $\varphi(g)$ . Following the proof of inequality (15), we obtain

$$\left\| \varphi(g) - \sum_{j=1}^s w_j \sigma(\varphi(g_j)) \right\|_2 \leq 2 \left\| u - \sum_{j=1}^s w_j \sigma(\varphi(g_j)) \right\|_2.$$

Note that  $\sum_{j=1}^s w_j \sigma(\varphi(g_j)) \in [-B, B]^k$  and  $u$  is uniformly drawn from  $[-B, B]^k$ . Thus, with probability at least  $(\frac{\epsilon}{4})^k$ , we have

$$\left\| \varphi(g) - \sum_{j=1}^s w_j \sigma(\varphi(g_j)) \right\|_2 \leq \epsilon\sqrt{k}B. \quad (18)$$

Combining inequalities (16), (17) and (18) and using the fact that  $B \geq 1$ , we have

$$\left\| \varphi(g) - \varphi(f^*) \right\|_{\infty} \leq (2m-1)\epsilon\sqrt{k}B^m,$$

with probability at least

$$p_{m-1}^s \cdot \left(\frac{\epsilon}{4}\right)^k = \left(\frac{\epsilon}{4}\right)^{k\left(\frac{s(s^{m-1}-1)}{s-1}+1\right)} = \left(\frac{\epsilon}{4}\right)^{k(s^m-1)/(s-1)} = p_m,$$

which completes the induction.

## B Proof of Theorem 2

### Proof of Part (a)

We first prove  $\hat{f} \in \mathcal{N}_m$ . Indeed, the definition of  $b_T$  implies

$$\sum_{t=1}^T \frac{B}{2b_T} \left| \log\left(\frac{1-\mu_t}{1+\mu_t}\right) \right| \leq B, \quad (19)$$

Notice that  $\hat{f} = \sum_{t=1}^T \frac{B}{2b_T} \log\left(\frac{1-\mu_t}{1+\mu_t}\right) \hat{g}_t$ , where  $\hat{g}_t \in \mathcal{N}_{m-1}$ . Thus, combining inequality (19) with the definition of  $\mathcal{N}_m$  implies  $\hat{f} \in \mathcal{N}_m$ . The time complexity bound is obtained by plugging in the bound from Theorem 1.

It remains to establish the correctness of  $\hat{f}$ . We may write any function  $f \in \mathcal{N}_m$  as

$$f(x) = \sum_{j=1}^d w_j \sigma(f_j(x)) \quad \text{where } w_j \geq 0 \text{ for all } j \in [d].$$

The constraints  $w_j \geq 0$  are always satisfiable, otherwise since  $\sigma$  is an odd function we may write  $w_j \sigma(f_j(x))$  as  $(-w_j) \sigma(-f_j(x))$  so that it satisfies the constraint. The function  $f_j$  or  $-f_j$  belongs to the class  $\mathcal{N}_{m-1}$ . We use the following result by [Shalev-Shwartz and Singer \[2010\]](#): Assume that there exists  $f^* \in \mathcal{N}_m$  which separate the data with margin  $\gamma$ . Then for any set of non-negative importance weights  $\{\alpha_i\}_{i=1}^n$ , there is a function  $f \in \mathcal{N}_{m-1}$  such that  $\sum_{i=1}^n \alpha_i \sigma(-y_i f(x_i)) \leq -\frac{\gamma}{B}$ . This implies that, for every  $t \in [T]$ , there is  $f \in \mathcal{N}_{m-1}$  such that

$$G_t(f) = \sum_{i=1}^n \alpha_{t,i} \sigma(-y_i f(x_i)) \leq -\frac{\gamma}{B}.$$

Hence, with probability at least  $1 - \delta$ , the sequence  $\mu_1, \dots, \mu_T$  satisfies the relation

$$\mu_t = G_t(\hat{g}_t) \leq -\frac{\gamma}{2B} \quad \text{for every } t \in [T]. \quad (20)$$

Algorithm 2 is based on running AdaBoost for  $T$  iterations. The analysis of AdaBoost [Schapire and Singer \[1999\]](#) guarantees that for any  $\beta > 0$ , we have

$$\begin{aligned} \frac{1}{n} \sum_{i=1}^n e^{-\beta} \mathbb{I}[-y_i f_T(x_i) \geq -\beta] &\leq \frac{1}{n} \sum_{i=1}^n e^{-y_i f_T(x_i)} \\ &\leq \exp\left(-\frac{\sum_{t=1}^T \mu_t^2}{2}\right). \end{aligned}$$

Thus, the fraction of data that cannot be separated by  $f_T$  with margin  $\beta$  is bounded by  $\exp(\beta - \frac{\sum_{t=1}^T \mu_t^2}{8B^2})$ . If we choose

$$\beta := \frac{\sum_{t=1}^T \mu_t^2}{2} - \log(n+1),$$

then this fraction is bounded by  $\frac{1}{n+1}$ , meaning that all points are separated with margin  $\beta$ . Recall that  $\widehat{f}$  is a scaled version of  $f_T$ . As a consequence, all points are separated by  $\widehat{f}$  with margin

$$\frac{B\beta}{b_T} = \frac{\sum_{t=1}^T \mu_t^2 - 2\log(n+1)}{\frac{1}{B} \sum_{t=1}^T \log(\frac{1-\mu_t}{1+\mu_t})}.$$

Since  $\mu_t \geq -1/2$ , it is easy to verify that  $\log(\frac{1-\mu_t}{1+\mu_t}) \leq 4|\mu_t|$ . Using this fact and Jensen's inequality, we have

$$\frac{B\beta}{b_T} \geq \frac{(\sum_{t=1}^T |\mu_t|)^2 / T - 2\log(n+1)}{\frac{4}{B} \sum_{t=1}^T |\mu_t|}.$$

The right-hand side is a monotonically increasing function of  $\sum_{t=1}^T |\mu_t|$ . Plugging in the bound in (20), we find that

$$\frac{B\beta}{b_T} \geq \frac{\gamma^2 T / (4B^2) - 2\log(n+1)}{2\gamma T / B^2}.$$

Plugging in  $T = \frac{16B^2 \log(n+1)}{\gamma^2}$ , some algebra shows that the right-hand side is equal to  $\gamma/16$  which completes the proof.

## Proof of Part (b)

Consider the empirical loss function

$$\ell(f) := \frac{1}{n} \sum_{i=1}^n h(-y_i f(x_i)),$$

where  $h(t) := \max\{0, 1 + 16t/\gamma\}$ . Part (a) implies that  $\ell(\widehat{f}) = 0$  with probability at least  $1 - \delta$ . Note that  $h$  is  $(16/\gamma)$ -Lipschitz continuous; the Rademacher complexity of  $\mathcal{N}_m$  with respect to  $n$  i.i.d. samples is bounded by  $\sqrt{q/n} B^m$  (see Lemma 2). By the classical Rademacher generalization bound [Bartlett and Mendelson, 2003, Theorem 8 and Theorem 12], if  $(x, y)$  is randomly sampled from  $\mathbb{P}$ , then with probability at least  $1 - \delta$  we have

$$\mathbb{E}[h(-y\widehat{f}(x))] \leq \ell(\widehat{f}) + \frac{32B^m}{\gamma} \cdot \sqrt{\frac{q}{n}} + \sqrt{\frac{8\log(2/\delta)}{n}}.$$

Thus, in order to bound the generalization loss by  $\epsilon$  with probability  $1 - 2\delta$ , it suffices to choose  $n = \text{poly}(1/\epsilon, \log(1/\delta))$ . Since  $h(t)$  is an upper bound on the zero-one loss  $\mathbb{I}[t \geq 0]$ , we obtain the claimed bound. ■

## C Proof of Corollary 1

The first step is to use the improper learning algorithm [Zhang et al., 2015, Algorithm 1] to learn a predictor  $\widehat{g}$  that minimizes the following risk function:

$$\ell(g) := \mathbb{E}[\phi(-\widetilde{y}g(x))] \quad \text{where} \quad \phi(t) := \begin{cases} -\frac{2\eta}{1-2\eta} + \frac{\eta(t+\gamma)}{(1-\eta)(1-2\eta)\gamma} & \text{if } t \leq -\gamma, \\ -\frac{2\eta}{1-2\eta} + \frac{t+\gamma}{(1-2\eta)\gamma} & \text{if } t > -\gamma. \end{cases}$$

Since  $\eta < 1/2$ , the function  $\phi$  is convex and Lipschitz continuous. The activation function  $\text{erf}(x)$  satisfies the condition of [Zhang et al., 2015, Theorem 1]. Thus, with sample complexity  $\text{poly}(1/\tau, \log(1/\delta))$  and time complexity  $\text{poly}(d, 1/\tau, \log(1/\delta))$ , the resulting predictor  $\widehat{g}$  satisfies

$$\ell(\widehat{g}) \leq \ell(f^*) + \tau \quad \text{with probability at least } 1 - \delta/3.$$

By the definition of  $\tilde{y}$  and  $\phi$ , it is straightforward to verify that

$$\ell(g) = \mathbb{E}[(1 - \eta)\phi(-yg(x)) + \eta\phi(yg(x))] = \mathbb{E}[\psi(-yg(x))] \quad (21)$$

where

$$\psi(t) := \begin{cases} 0 & \text{if } t < -\gamma, \\ 1 + t/\gamma & \text{if } -\gamma \leq t \leq \gamma, \\ 2 + \frac{2\eta^2 - 2\eta + 1}{(1-\eta)(1-2\eta)\gamma}(t - \gamma) & \text{if } t > \gamma. \end{cases}$$

Recall that  $yf^*(x) \geq \gamma$  almost surely. From the definition of  $\psi$ , we have  $\ell(f^*) = 0$ , so that  $\ell(\hat{g}) \leq \ell(f^*) + \tau$  implies  $\ell(\hat{g}) \leq \tau$ . Also note that  $\psi(t)$  upper bounds the indicator  $\mathbb{I}[t \geq 0]$ , so that the right-hand side of equation (21) provides an upper bound on the probability  $\mathbb{P}(\text{sign}(g(x)) \neq y)$ . Consequently, defining the classifier  $\hat{h}(x) := \text{sign}(g(x))$ , then we have

$$\mathbb{P}(\hat{h}(x) \neq y) \leq \ell(\hat{g}) \leq \tau \quad \text{with probability at least } 1 - \delta/3.$$

Given the classifier  $\hat{h}$ , we draw another random dataset of  $n$  points taking the form  $\{(x_i, y_i)\}_{i=1}^n$ . If  $\tau = \frac{\delta}{3n}$ , then this dataset is equal to  $\{(x_i, \hat{h}(x_i))\}_{i=1}^n$  with probability at least  $1 - 2\delta/3$ . Let the BoostNet algorithm take  $\{(x_i, \hat{h}(x_i))\}_{i=1}^n$  as its input. With sample size  $n = \text{poly}(1/\epsilon, \log(1/\delta))$ , Theorem 2 implies that the algorithm learns a neural network  $\hat{f}$  such that  $\mathbb{P}(\text{sign}(\hat{f}(x)) \neq y) \leq \epsilon$  with probability at least  $1 - \delta$ . Plugging in the assignments of  $n$  and  $\tau$ , the overall sample complexity is  $\text{poly}(1/\epsilon, 1/\delta)$  and the overall computation complexity is  $\text{poly}(d, 1/\epsilon, 1/\delta)$ .

## D Proof of Proposition 1

The following MAX-2-SAT problem is known to be NP-hard [Papadimitriou and Yannakakis, 1991].

**Definition 1 (MAX-2-SAT)** *Given  $n$  literals  $\{z_1, \dots, z_n\}$  and  $d$  clauses  $\{c_1, \dots, c_d\}$ . Each clause is the conjunction of two arguments that may either be a literal or the negation of a literal\*. The goal is to determine the maximum number of clauses that can be simultaneously satisfied by an assignment.*

We consider the loss function:

$$\ell(w) := -\frac{1}{n} \sum_{i=1}^n \max\{0, \langle w, x_i \rangle\} = \frac{1}{n} \sum_{i=1}^n \min\{0, \langle w, -x_i \rangle\}. \quad (22)$$

It suffices to prove that: it is NP-hard to compute a vector  $\hat{w} \in \mathbb{R}^d$  such that  $\|\hat{w}\|_2 \leq 1$  and

$$\ell(\hat{w}) \leq \ell(w^*) + \frac{1}{(2n+2)d}, \quad (23)$$

To prove this claim, we reduce MAX-2-SAT to the minimization problem. Given a MAX-2-SAT instance, we construct a loss function  $\ell$  so that if any algorithm computes a vector  $\hat{w}$  satisfying inequality (23), then the vector  $\hat{w}$  solves MAX-2-SAT.

First, we construct  $n+1$  vectors in  $\mathbb{R}^d$ . Define the vector  $x_0 := \frac{1}{\sqrt{d}}\mathbf{1}_d$ , and for  $i = 1, \dots, n$ , the vectors  $x_i := \frac{1}{\sqrt{d}}x'_i$ , where  $x'_i \in \mathbb{R}^d$  is given by

$$x'_{ij} = \begin{cases} 1 & \text{if } z_i \text{ appears in } c_j, \\ -1 & \text{if } \neg z_i \text{ appears in } c_j, \\ 0 & \text{otherwise.} \end{cases}$$

---

\*In the standard MAX-2-SAT setup, each clause is the disjunction of two literals. However, any disjunction clause can be reduced to three conjunction clauses. In particular, a clause  $z_1 \vee z_2$  is satisfied if and only if one of the following is satisfied:  $z_1 \wedge z_2, \neg z_1 \wedge z_2, z_1 \wedge \neg z_2$ .

It is straightforward to verify that  $\|x_i\|_2 \leq 1$  for any  $i \in \{0, 1, \dots, n\}$ . We consider the following minimization problem which is special case of the formulation (22):

$$\ell(w) = \frac{1}{2n+2} \sum_{i=0}^n \left( \min\{0, \langle w, x_i \rangle\} + \min\{0, \langle w, -x_i \rangle\} \right).$$

The goal is to find a vector  $w^* \in \mathbb{R}^d$  such that  $\|w^*\|_2 \leq 1$  and it minimizes the function  $\ell(w)$ .

Notice that for every index  $i$ , at most one of  $\min\{0, \langle w, x_i \rangle\}$  and  $\min\{0, \langle w, -x_i \rangle\}$  is non-zero. Thus, we may write the minimization problem as

$$\begin{aligned} \min_{\|w\|_2 \leq 1} (2n+2)\ell(w) &= \min_{\|w\|_2 \leq 1} \sum_{i=0}^n \left( \min_{\alpha_i \in \{-1, 1\}} \langle w, \alpha_i x_i \rangle \right) = \min_{\alpha \in \{-1, 1\}^{n+1}} \min_{\|w\|_2 \leq 1} \sum_{i=0}^n \langle w, \alpha_i x_i \rangle \\ &= \min_{\alpha \in \{-1, 1\}^{n+1}} - \left\| \sum_{i=0}^n \alpha_i x_i \right\|_2 \\ &= - \left( \max_{\alpha \in \{-1, 1\}^{n+1}} \sum_{j=1}^d \left( \sum_{i=0}^n \alpha_i x_{ij} \right)^2 \right)^{1/2}. \end{aligned} \quad (24)$$

We claim that maximizing  $\sum_{j=1}^d \left( \sum_{i=0}^n \alpha_i x_{ij} \right)^2$  with respect to  $\alpha$  is equivalent to maximizing the number of satisfiable clauses. In order to prove this claim, we consider an arbitrary assignment to  $\alpha$  to construct a solution to the MAX-2-SAT problem. For  $i = 1, 2, \dots, n$ , let  $z_i = \text{true}$  if  $\alpha_i = \alpha_0$ , and let  $z_i = \text{false}$  if  $\alpha_i = -\alpha_0$ . With this assignment, it is straightforward to verify the following: if the clause  $c_j$  is satisfied, then the value of  $\sum_{i=0}^n \alpha_i x_{ij}$  is either  $3/\sqrt{d}$  or  $-3/\sqrt{d}$ . If the clause is not satisfied, then the value of the expression is either  $1/\sqrt{d}$  or  $-1/\sqrt{d}$ . To summarize, we have

$$\sum_{j=1}^d \left( \sum_{i=0}^n \alpha_i x_{ij} \right)^2 = 1 + \frac{8 \times (\# \text{ of satisfied clauses})}{d}. \quad (25)$$

Thus, solving problem (24) determines the maximum number of satisfiable clauses:

$$(\max \# \text{ of satisfied clauses}) = \frac{d}{8} \left( \left( \min_{\|w\|_2 \leq 1} (2n+2)\ell(w) \right)^2 - 1 \right).$$

By examining equation (24) and (25), we find that the value of  $(2n+2)\ell(w)$  ranges in  $[-3, 0]$ . Thus, the MAX-2-SAT number is exactly determined if  $(2n+2)\ell(\hat{w})$  is at most  $1/d$  larger than the optimal value. This optimality gap is guaranteed by inequality (23), which completes the reduction.

## E Proof of Proposition 2

We reduce the PAC learning of intersection of  $T$  halfspaces to the problem of learning a neural network. Assume that  $T = \Theta(d^\rho)$  for some  $\rho > 0$ . We claim that for any number of pairs taking the form  $(x, h^*(x))$ , there is a neural network  $f^* \in \mathcal{N}_2$  that separates all pairs with margin  $\gamma$ , and moreover that the margin is bounded as  $\gamma = 1/\text{poly}(d)$ .

To prove the claim, recall that  $h^*(x) = 1$  if and only if  $h_1(x) = \dots = h_T(x) = 1$  for some  $h_1, \dots, h_T \in H$ . For any  $h_t$ , the definition of  $H$  implies that there is a  $(w_t, b_t)$  pair such that if  $h_t(x) = 1$  then  $w_t^T x - b_t - 1/2 \geq 1/2$ , otherwise  $w_t^T x - b_t - 1/2 \leq -1/2$ . We consider the two possible choices of the activation function:

- **Piecewise linear function:** If  $\sigma(x) := \min\{1, \max\{-1, x\}\}$ , then let

$$g_t(x) := \sigma(c(w_t^T x - b_t - 1/2) + 1),$$

for some quantity  $c > 0$ . The term inside the activation function can be written as  $\langle \tilde{w}, x' \rangle$  where

$$\tilde{w} = (c\sqrt{2d+2}w_t, -c\sqrt{2d+2}(b_t + 1/2), \sqrt{2}) \quad \text{and} \quad x' = \left( \frac{x}{\sqrt{2d+2}}, \frac{1}{\sqrt{2d+2}}, \frac{1}{\sqrt{2}} \right).$$

Note that  $\|x'\|_2 \leq 1$ , and with a sufficiently small constant  $c = 1/\text{poly}(d)$  we have  $\|\tilde{w}\|_2 \leq 2$ . Thus,  $g_t(x)$  is the output of a one-layer neural network. If  $h_t(x) = 1$ , then  $g_t(x) = 1$ , otherwise  $g_t(x) \leq 1 - c/2$ . Now consider the two-layer neural network  $f(x) := c/4 - T + \sum_{t=1}^T g_t(x)$ . If  $h^*(x) = 1$ , then we have  $g_t(x) = 1$  for every  $t \in [T]$  which implies  $f(x) = c/4$ . If  $h^*(x) = -1$ , then we have  $g_t(x) \leq 1 - c/2$  for at least one  $t \in [T]$  which implies  $f(x) \leq -c/4$ . Thus, the neural network  $f$  separates the data with margin  $c/4$ . We normalize the edge weights on the second layer to make  $f$  belong to  $\mathcal{N}_2$ . After normalization, the network still has margin  $1/\text{poly}(d)$ .

- **ReLU function:** if  $\sigma(x) := \max\{0, x\}$ , then let  $g_t(x) := \sigma(-c(w_t^T x - b_t - 1/2))$  for some quantity  $c > 0$ . We may write the term inside the activation function as  $\langle \tilde{w}, x' \rangle$  where  $\tilde{w} = (-c\sqrt{d+1}w_t, c\sqrt{d+1}(b_t + 1/2))$  and  $x' = (x, 1)/\sqrt{d+1}$ . It is straightforward to verify that  $\|x'\|_2 \leq 1$ , and with a sufficiently small  $c = 1/\text{poly}(d)$  we have  $\|\tilde{w}\|_2 \leq 2$ . Thus,  $g_t(x)$  is the output of a one-layer neural network. If  $h_t(x) = 1$ , then  $g_t(x) = 0$ , otherwise  $g_t(x) \geq c/2$ . Let  $f(x) := c/4 - \sum_{t=1}^T g_t(x)$ , then this two-layer neural network separates the data with margin  $c/4$ . After normalization the network belongs to  $\mathcal{N}_2$  and it still separates the data with margin  $1/\text{poly}(d)$ .

To learn the intersection of  $T$  halfspaces, we learn a neural network based on  $n$  i.i.d. points taking the form  $(x, h^*(x))$ . Assume that the neural network is efficiently learnable. Since there exists  $f^* \in \mathcal{N}_m$  which separates the data with margin  $\gamma = 1/\text{poly}(d)$ , we can learn a network  $\hat{f}$  in  $\text{poly}(d, 1/\epsilon, 1/\delta)$  sample complexity and time complexity, and satisfies  $\mathbb{P}(\text{sign}(\hat{f}(x)) \neq h^*(x)) \leq \epsilon$  with probability  $1 - \delta$ . It contradicts with the assumption that the intersection of  $T$  halfspaces is not efficiently learnable.

## References

- P. L. Bartlett and S. Mendelson. Rademacher and gaussian complexities: Risk bounds and structural results. *The Journal of Machine Learning Research*, 3:463–482, 2003.
- S. Kakade and A. Tewari. Lecture note: Rademacher composition and linear prediction. 2008.
- S. M. Kakade, K. Sridharan, and A. Tewari. On the complexity of linear prediction: Risk bounds, margin bounds, and regularization. In *Advances in Neural Information Processing Systems*, volume 21, pages 793–800, 2009.
- M. Ledoux and M. Talagrand. *Probability in Banach Spaces: isoperimetry and processes*, volume 23. Springer Science & Business Media, 2013.
- C. H. Papadimitriou and M. Yannakakis. Optimization, approximation, and complexity classes. *Journal of computer and system sciences*, 43(3):425–440, 1991.
- G. Pisier. Remarques sur un résultat non publié de B. Maurey. *Séminaire Analyse Fonctionnelle*, pages 1–12, 1980.
- R. E. Schapire and Y. Singer. Improved boosting algorithms using confidence-rated predictions. *Machine Learning*, 37(3):297–336, 1999.
- S. Shalev-Shwartz and Y. Singer. On the equivalence of weak learnability and linear separability: New relaxations and efficient boosting algorithms. *Machine Learning*, 80(2-3):141–163, 2010.
- Y. Zhang, J. D. Lee, and M. I. Jordan.  $\ell_1$ -regularized neural networks are improperly learnable in polynomial time. *arXiv:1510.03528*, 2015.
